# Supplementary material for: Exposure to Non-Steroidal Anti-Inflammatory Drugs during Pregnancy and the Risk of Selected Birth Defects: A Prospective Cohort Study
Source: PubMed Central journal article supplement (PMC3138772; doi:10.1371/journal.pone.0022174), 2011-07-18
Supplement: pone.0022174.s001.pdf [file pone.0022174.s001.pdf]

**Table S1.** Characteristics of the 23 infants born with selected birth defects after prenatal exposure to non-steroidal anti-inflammatory drugs (NSAIDs).

| <b>Birth defect</b>                                             | <b>Maternal age (y)</b> | <b>Gestational age (wk)</b> | <b>Pregnancy outcome</b> | <b>NSAID used</b>     | <b>Timing of exposure (gest. wk)</b> | <b>Chronic/serious maternal condition</b> | <b>Other drugs used in first part of pregnancy</b>                          |
|-----------------------------------------------------------------|-------------------------|-----------------------------|--------------------------|-----------------------|--------------------------------------|-------------------------------------------|-----------------------------------------------------------------------------|
| Anencephaly, spina bifida                                       | 32                      | 18                          | Miscarriage              | Ibuprofen             | 0–4, 9–12                            | None                                      | Acetaminophen, ebastine, fluticasone, unspecified allergy/asthma medication |
| Atrial septal defect                                            | 30                      | 39                          | Live birth               | Aspirin               | 9–12                                 | Endocarditis                              | Dermatological preparation for hemorrhoids                                  |
| Atrial septal defect                                            | 28                      | 37                          | Live birth               | Ibuprofen             | 5–12                                 | None                                      | Acetaminophen                                                               |
| Atrial septal defect                                            | 33                      | 41                          | Live birth               | Ibuprofen             | 0–4                                  | None                                      | None                                                                        |
| Atrial septal defect                                            | 31                      | 37                          | Live birth               | Ibuprofen, ketoprofen | 5–12                                 | Cardiopathy                               | Clotrimazole, xylometazoline                                                |
| Atrial septal defect                                            | 35                      | 40                          | Live birth               | Ibuprofen             | 5–12                                 | None                                      | Acetaminophen                                                               |
| Atrial septal defect, patent ductus arteriosus                  | 34                      | 37                          | Live birth               | Piroxicam             | 5–8                                  | None                                      | Acetaminophen, phenoxymethylpenicillin                                      |
| Atrial septal defect, patent ductus arteriosus                  | 27                      | 40                          | Live birth               | Ibuprofen             | 0–4                                  | None                                      | Cetirizine                                                                  |
| Atrial and ventricular septal defects, patent ductus arteriosus | 28                      | 39                          | Live birth               | Aspirin               | 0–8                                  | None                                      | Acetaminophen, alginate acid                                                |
| Cleft lip                                                       | 28                      | 40                          | Live birth               | Ibuprofen             | 9–12                                 | None                                      | None                                                                        |
| Imperforate anus                                                | 30                      | 42                          | Live birth               | Ibuprofen             | 5–8                                  | None                                      | Econazole                                                                   |
| Tetralogy of Fallot, other anomaly pulmonary artery             | 31                      | 34                          | Live birth               | Ibuprofen             | 9–12                                 | None                                      | Cyclizine, oxymetazoline                                                    |
| Transposition of the great vessels, coarctation of aorta        | 35                      | 39                          | Stillbirth               | Ibuprofen             | 0–12                                 | None                                      | None                                                                        |
| Ventricular septal defect                                       | 28                      | 41                          | Live birth               | Ibuprofen             | 5–8                                  | None                                      | Benzoyl peroxide, budesonide, phenylpropanolamine, podophyllotoxin          |
| Ventricular septal defect                                       | 35                      | 40                          | Live birth               | Ibuprofen             | 5–8                                  | Epilepsy                                  | Lamotrigine, sumatriptan                                                    |
| Ventricular septal defect                                       | 27                      | 40                          | Live birth               | Ibuprofen             | 0–12                                 | None                                      | Acetaminophen                                                               |

|                                                        |    |    |            |                          |      |                                                |                                                                                       |
|--------------------------------------------------------|----|----|------------|--------------------------|------|------------------------------------------------|---------------------------------------------------------------------------------------|
| Ventricular septal defect                              | 29 | 38 | Live birth | Aspirin                  | 0–4  | Asthma,<br>ventricular<br>tachycardia          | Acetaminophen, flecainide,<br>hydrocortisone, unspecified<br>dermatologic preparation |
| Ventricular septal defect                              | 31 | 40 | Live birth | Ibuprofen                | 5–8  | None                                           | Ferrous sulfate                                                                       |
| Ventricular septal defect                              | 32 | 42 | Live birth | Ibuprofen                | 9–12 | None                                           | Acetaminophen, clomitrazone,<br>nitrofurantoin, pivmecillinam                         |
| Ventricular septal defect                              | 32 | 40 | Live birth | Diclofenac,<br>ibuprofen | 0–4  | None                                           | Bumetanide, clotrimazole,<br>lactulose                                                |
| Ventricular septal defect                              | 25 | 38 | Live birth | Ibuprofen                | 0–4  | Epilepsy                                       | None                                                                                  |
| Ventricular septal defect                              | 33 | 41 | Live birth | Ibuprofen                | 5–8  | None                                           | None                                                                                  |
| Ventricular septal defect,<br>patent ductus arteriosus | 28 | 40 | Live birth | Ibuprofen                | 0–4  | Asthma, chronic<br>urinary tract<br>infections | Acetaminophen, amitriptyline,<br>clotrimazole, desonide,<br>tramadol                  |
